# Supplementary material
Source: MDPI journal article supplement (https://www.mdpi.com/1996-1073/15/22/8357)
Supplement: s1 [file s1]

## Supporting Information

### Mn-Rich NMC Cathode for Lithium-Ion Batteries at High-Voltage Operation

Arjun K. Thapa<sup>a\*</sup>, Brandon W. Lavery<sup>a</sup>, Ram K Hona<sup>c</sup>, Nawraj Sapkota<sup>d</sup>, Milinda Kalutara Kolalage<sup>d</sup>, Ayodeji Adeniran<sup>c</sup>, Babajide Patrick Ajayi<sup>a</sup>, Muhammad Akram Zain<sup>a</sup>, Hui Wang<sup>c</sup>, Thad Druffel<sup>a</sup>, Jacek B. Jasinski<sup>a</sup>, Gamini U. Sumanasekera<sup>a,d</sup>, Mahendra K. Sunkara<sup>a,b</sup>, Masaki Yoshio<sup>f</sup>

<sup>a</sup>Conn Center for Renewable Energy Research, University of Louisville, KY 40292, USA

<sup>b</sup>Department of Chemical Engineering, University of Louisville, KY 40292, USA

<sup>c</sup>Department of Chemistry, University of Louisville, KY 40292, USA

<sup>d</sup>Department of Physics & Astronomy, University of Louisville, KY 40292, USA

<sup>e</sup>Department of Mechanical Engineering, University of Louisville, KY 40292, USA

<sup>f</sup>Advance Research Center, Saga University, Yoga-machi, Saga 840-0047, Japan

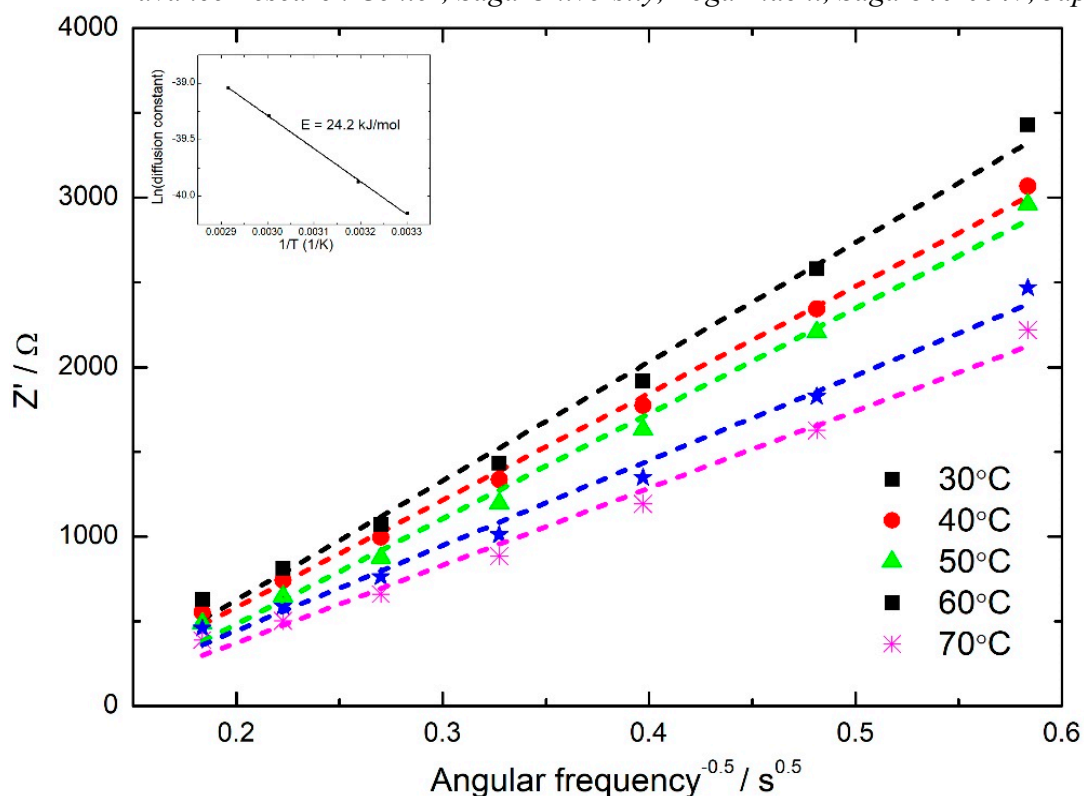

Figure S1 Graph of Warburg Impedance ( $Z'$ ) vs inverse square root of angular frequency at varying temperatures. (Inset: Arrhenius plot of the apparent diffusion constants).

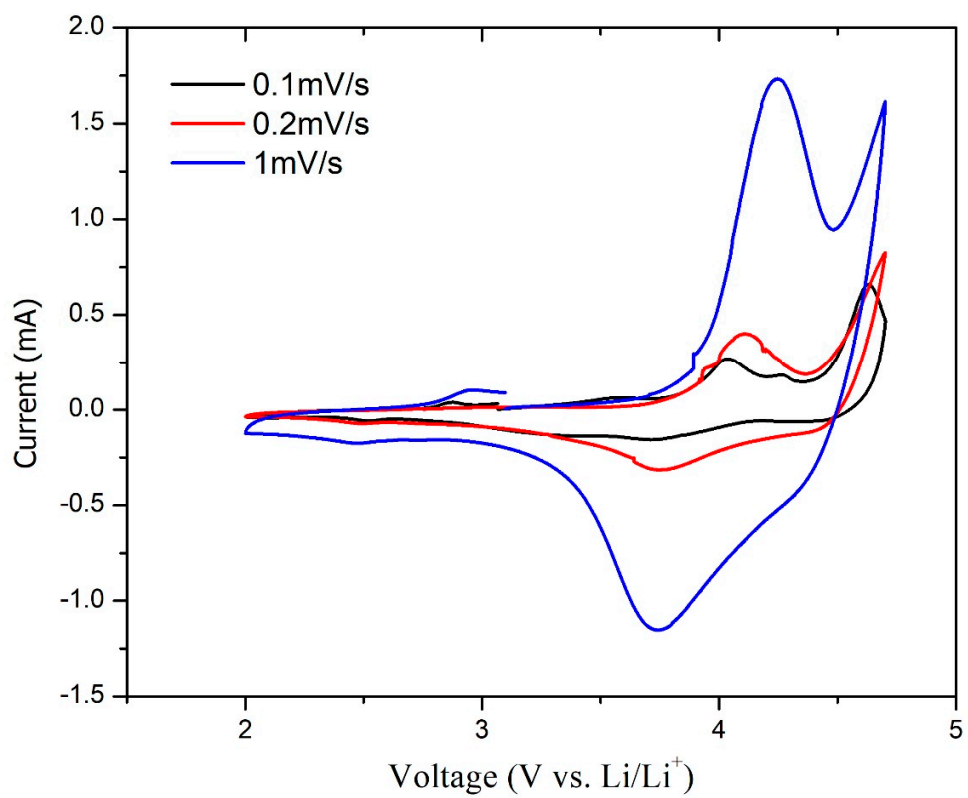

Figure S2. Cyclic Voltammetry plot for NMC262 at different scan rate (0.1mV/s, 0.2mV/s, 1mV/s) and 30°C.

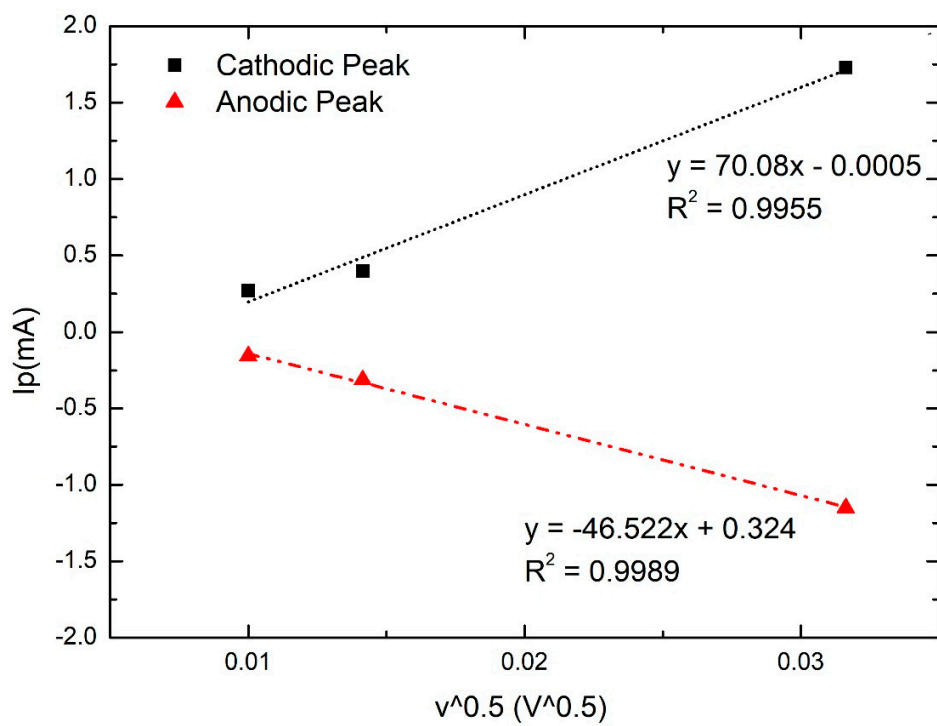

**Figure S3** Graphs of cathodic and anodic peak current ( $I_p$ ) vs square root of scan rate ( $v$ ).

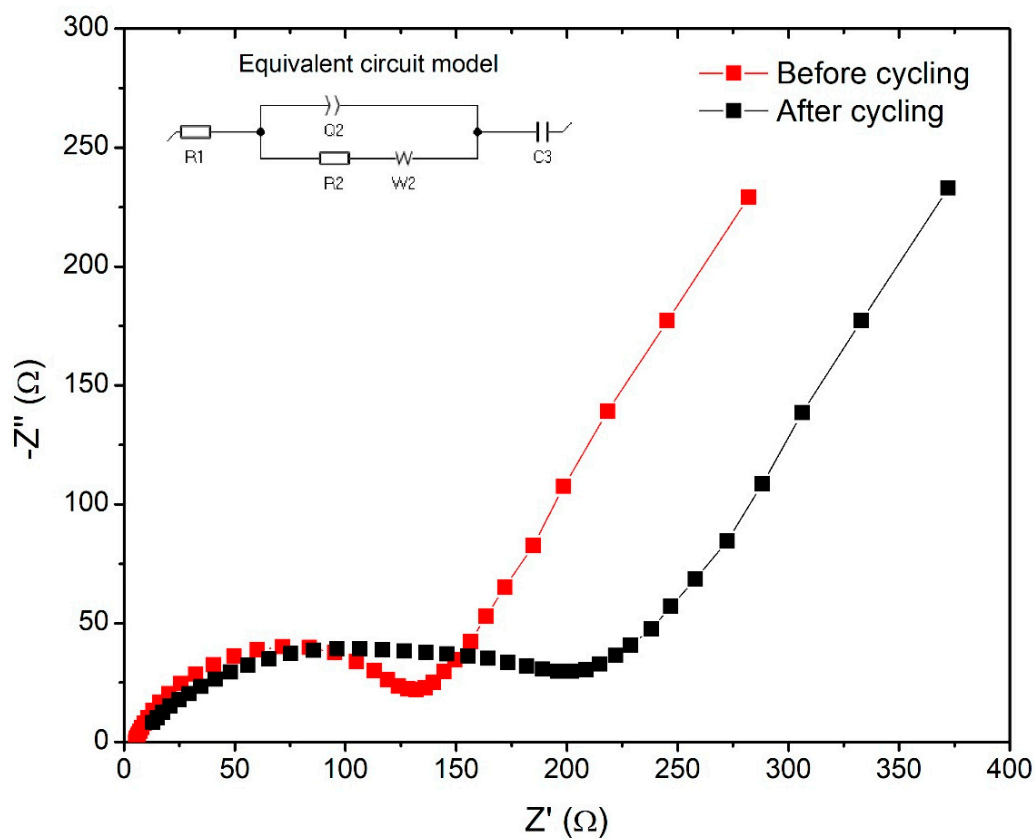

**Figure S4.** Impedance of half-cell with NMC262 before and after cycling. Insert is the Equivalent circuit model.

Table S1 Impedance analysis of NMC262 half-cell before and after cycling

|                | $R_{SE} (\Omega)$ | $R_{INT} (\Omega)$ | $R_{TOTAL} (\Omega)$ |
|----------------|-------------------|--------------------|----------------------|
| Before cycling | 5.38              | 117.60             | 122.98               |
| After cycling  | 12.14             | 194.40             | 206.54               |

Table S2: Atomic ratios calculated based on EDS spectrums

| <i>Sample Label</i> | <i>Atomic Ratio</i> |           |           | <i>Secondary particle size</i><br>( $\mu\text{m}$ ) |
|---------------------|---------------------|-----------|-----------|-----------------------------------------------------|
|                     | <i>Ni</i>           | <i>Mn</i> | <i>Co</i> |                                                     |
| NMC 262             | 0.17                | 0.63      | 0.20      | 1-3                                                 |
| NMC 352             | 0.26                | 0.53      | 0.22      | 3-6                                                 |
| NMC 442             | 0.37                | 0.42      | 0.21      | 2-5                                                 |

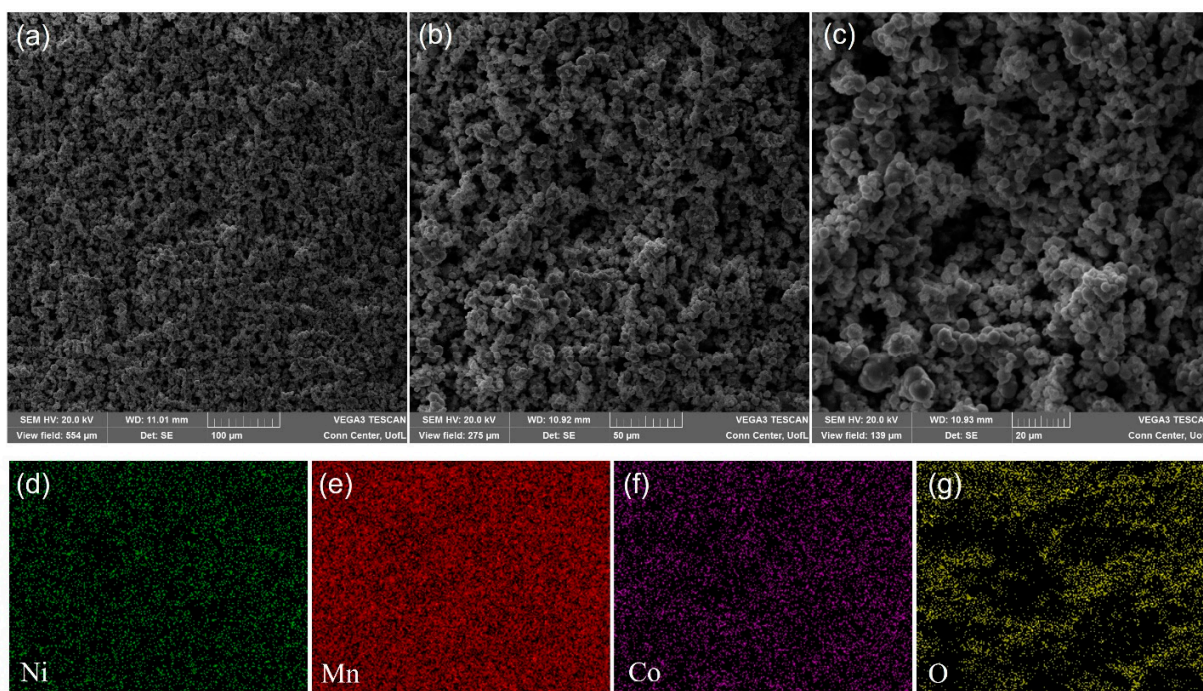

Figure S5: SEM images of sample NMC 262 at magnifications of (a) 500, (b) 1000, (c) 2000 and EDS mappings of (d) Ni, (e) Mn, (f) Co and (g) O

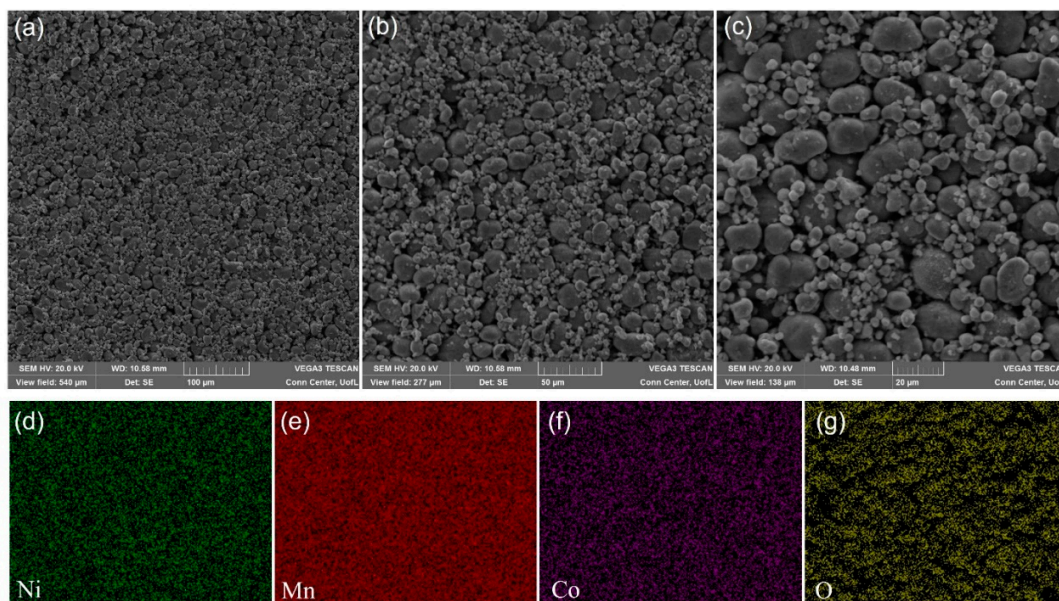

Figure S6: SEM images of sample NMC 352 at magnifications of (a) 500, (b) 1000, (c) 2000 and EDS mappings of (d) Ni, (e) Mn, (f) Co and (g) O

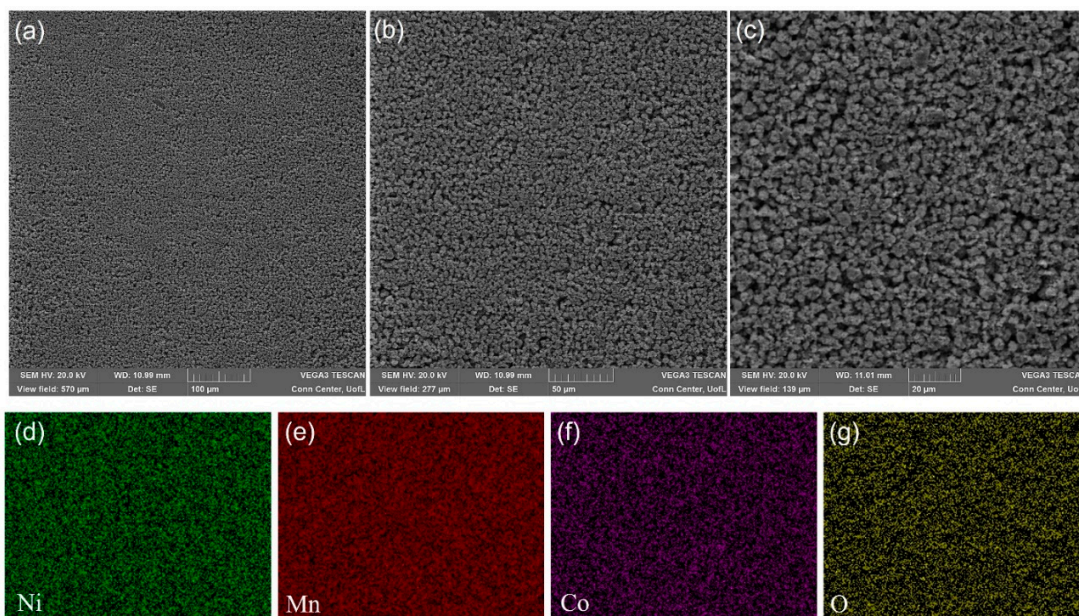

Figure S7: SEM images of sample NMC 442 at magnifications of (a) 500, (b) 1000, (c) 2000 and EDS mappings of (d) Ni, (e) Mn, (f) Co and (g) O
